# Supplementary material for: COVID-19 and Comorbidities: What Has Been Unveiled by Metabolomics?
Source: MDPI journal article supplement (doi:10.3390/metabo14040195), 2024-03-30
Supplement: s1 [file s1]

**Table S1:** Summary of Metabolites Found upon bibliographic revision

| Comorbidities | Metabolite                                                                                                       | Biological matrix | Technique of analysis | Metabolomic approach    | Altered metabolic pathways                                                                                                                  | References |
|---------------|------------------------------------------------------------------------------------------------------------------|-------------------|-----------------------|-------------------------|---------------------------------------------------------------------------------------------------------------------------------------------|------------|
| Diabetes      | Palmitic acid (C16:0), Docosapentaenoic acid (C22:5, DPA), Docosahexaenoic acid (C22:6, DHA).                    | Serum             | FIA-MS/MS             | Targeted                | Triacylglycerols and long-chain polyunsaturated fatty acids (n3 and n6).                                                                    | [48]       |
|               | Phenylalanine, Alanine, Citrulline, Proline.                                                                     | Serum             | FIA-MS/MS             | Targeted                | Phenylalanine metabolism, tyrosine metabolism, Arginine and citrulline metabolic pathways.                                                  | [49]       |
|               | Leucine, Isoleucine, Valine, Glutamate, Phenylalanine, Glutamine, Alanine, Proline, Cysteine                     | Plasma            | UHPLC-MS/MS           | Targeted                | Amino-acid metabolism                                                                                                                       | [50]       |
|               | Sarcosine, Cholesterol esters, Aconitic acid, Spermidine, Glycosylceramides.                                     | Serum             | LC-MS/MS              | Targeted                | Glycosylceramide, Amino-acid metabolism, Cholesterol esters                                                                                 | [53]       |
|               | 1,5-anhydro-D-glucitol (1,5-AG)                                                                                  | Serum             | UHPLC-MS/MS           | Targeted                | Glucose                                                                                                                                     | [54]       |
| Obesity       | Ceramides C18:0, C16:0, and C24:0; Tryptophan; Kynurenine; 3OH-Kynurenine.                                       | Plasma            | LC-MS/MS              | Targeted                | Tryptophan metabolism via kynurenine pathway and ceramide metabolism                                                                        | [19]       |
|               | N6-Acetyl-L-Lysine, p-Cresol, mevalonic acid, phenol, 3,4-dihydrocymandelic acid, gallic acid, homo-l-arginine.  | Plasma            | UHPLC-MS/MS           | Untargeted              | homocysteine degradation, methyl histidine metabolism, catecholamine biosynthesis urea cycle, and glutathione-arginine-proline metabolisms. | [72]       |
| Cancer        | N1-acetylspermidine, N1,N8-diacetylspermidine, N1,N12-diacetylspermine, Indole-3-propionate, 3-phenylpropionate. | Serum             | UHPLC-QqQ and GC-QqQ  | Untargeted and Targeted | Kynurenine metabolism, metabolism of acetylated polyamines.                                                                                 | [74]       |
|               | 3-hydroxybutyrate, Lactate, Leucine, Phenylalanine, Cytokines.                                                   | Plasma            | <sup>1</sup> H-NMR    | Untargeted              | Glycolysis/gluconeogenesis; glyoxylate and dicarboxylate metabolism; glycine, serine and threonine metabolism.                              | [79]       |

|                                             |                                                                                                                  |                                       |                          |            |                                                                                                                                                                                                  |       |
|---------------------------------------------|------------------------------------------------------------------------------------------------------------------|---------------------------------------|--------------------------|------------|--------------------------------------------------------------------------------------------------------------------------------------------------------------------------------------------------|-------|
| Kidney disease                              | Lysine, Threonine, Leucine, Isoleucine, Phenylalanine, Tryptophan, Indoleacetic acid, hydroxyphenylpyruvic acid. | Urine                                 | LC-MS                    | Targeted   | Kynurerine–quinolinate pathway                                                                                                                                                                   | [96]  |
| Cardiovascular Diseases and Blood Disorders | L-arginine, 3-hydroxyoctanoylcarnitine, Creatine, 3,5-tetradecadiencarnitine                                     | Plasma                                | UHPLC-MS                 | Untargeted | Coagulation cascade, platelet aggregation, myeloid leukocyte activation pathway, and arginine metabolism                                                                                         | [103] |
|                                             | Ornithine, N-acetylorithine, 3-amino-2-piperidone, Aspartic acid, Asparagine.                                    | Serum                                 | UHPLC-MS                 | Untargeted | Ornithine, or urea cycle, correlation with multiple cytokine and coagulation indexes using metadata (e.g. active part thromboplastin ratio, international normalized ratio and prothrombin time) | [104] |
|                                             | N-acetylneuraminate                                                                                              | Serum of SARS-CoV-2 infected hamsters | UHPLC-MS                 | Untargeted | Protein kinase signaling pathway                                                                                                                                                                 | [105] |
| Thyroid disorders                           | Thyroid-stimulating hormone, Ferritin, Free thyroxine.                                                           | Serum                                 | <sup>1</sup> H-RMN       | Targeted   | Thyroid-stimulating Metabolism                                                                                                                                                                   | [139] |
| Pulmonary tuberculosis                      | Aspartate, glycine, serine, threonine, leucine, isoleucine, valine, Betaine.                                     | Serum                                 | FIA-MS/MS and LC-MS/MS   | Targeted   | branched-chain amino acids (BCAAs), bile acid metabolism.                                                                                                                                        | [147] |
|                                             | 2,4-octadiene, 1-chloroheptane, Nonanal                                                                          | Expired air                           | GC-MS/MS                 | Untargeted |                                                                                                                                                                                                  |       |
| Tobacco smoking                             | Tryptophan, arginine and glycerophospholipid                                                                     | Serum                                 | UHPLC-MS/MS and GC-MS/MS | Untargeted | Metabolic pathways related to immunity and inflammation                                                                                                                                          | [179] |
| Immunological System                        | Succinate, Nicotinamide mononucleotide, Tryptofan, Kynurenine, Inosine,                                          | Serum                                 | UHPLC-MS/MS              | Targeted   | TCA cycle, NAD <sup>+</sup> metabolism, tryptophan-kynurenine pathway, purine metabolism, phenylalanine metabolism.                                                                              | [211] |
|                                             | Phenylalanine, Tyrosine                                                                                          | Serum                                 | <sup>1</sup> H-RMN       | Targeted   |                                                                                                                                                                                                  | [212] |
| Oxidative stress                            | Inosine, Guanosine, Adenosine, Serotonin, Taurine.                                                               | Plasma                                | UHPLC-MS                 | Untargeted | Purine metabolism, tryptophan metabolism, taurine metabolism, glutathione metabolism.                                                                                                            | [216] |
|                                             | Glutathione                                                                                                      | Plasma                                | LC-MS                    | Targeted   |                                                                                                                                                                                                  | [218] |
